# Supplementary material
Source: PubMed Central journal article supplement (PMC10573012)
Supplement: NIHMS1878804-supplement-Cobalt-catalyzed_alkene_hydrogenation_by_reductive_turnover-Supplementary_materials.pdf [file NIHMS1878804-supplement-Cobalt-catalyzed_alkene_hydrogenation_by_reductive_turnover-Supplementary_materials.pdf]

## **Cobalt-catalyzed alkene hydrogenation by reductive turnover**

Vincent van der Puyl<sup>a</sup>, Ruairi O. McCourt<sup>b</sup>, and Ryan A. Shenvi<sup>a</sup>

*<sup>a</sup>Department of Chemistry, Scripps Research, 10550 N. Torrey Lines Road, La Jolla, California 92037, United States*

*<sup>b</sup>Trinity Biomedical Sciences Institute (TBSI), Trinity College Dublin, The University of Dublin, Dublin 2, Ireland*

## Contents

|                                                                         |    |
|-------------------------------------------------------------------------|----|
| 1. General Methods.....                                                 | 3  |
| 2. Starting Materials.....                                              | 3  |
| 3. Olefin Hydrogenation .....                                           | 5  |
| 4. Olefin Hydrogenation products.....                                   | 6  |
| 5. Unsuccessful Substrates.....                                         | 8  |
| 6. Mechanistic Studies .....                                            | 8  |
| 7. $^1\text{H}$ and $^{13}\text{C}$ NMR Spectra of Novel Compounds..... | 10 |
| 8. References.....                                                      | 22 |

## 1. General Methods

All reactions were carried out under positive pressure of argon and glassware was oven-dried at 120 °C for a minimum of 12 hours or flame-dried with a propane torch under high vacuum unless otherwise stated. Anhydrous solvents were distilled over calcium hydride or purchased and used without further purification. Other commercially available reagents were also used without further purification. Reactions were monitored by thin layer chromatography (TLC) using silica gel plates purchased from EMD chemicals (TLC Silica gel 60 F<sub>254</sub>, 250 μm thickness), gas chromatography mass spectrometry (GCMS, Agilent 7820A/5975). Flash column chromatography was performed over Silica gel 60 (particle size 0.04–0.063 mm) from EMD chemicals.

NMR spectra were recorded on Varian-400, Bruker DPX-400, DRX-500 and DRX-600 (cryoprobe) spectrometers. The following abbreviations (or combinations thereof) were used to explain multiplicities: s = singlet, d = doublet, t = triplet, q = quartet, m = multiplet, app = apparent, br = broad.

## 2. Starting Materials

4-phenyl-1-butene, AlCl<sub>3</sub>, was purchased and used without further purification.

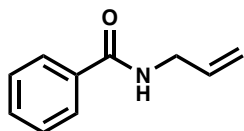

*N*-allylbenzamide was prepared according to literature procedure. Spectral data matched that reported in the literature.<sup>1</sup>

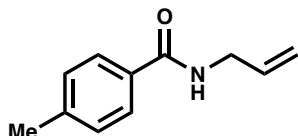

*N*-allyl-4-methylbenzamide was prepared according to literature procedure. Spectral data matched that reported in the literature.<sup>2</sup>

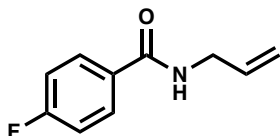

*N*-allyl-4-fluorobenzamide was prepared according to literature procedure. Spectral data matched that reported in the literature.<sup>3</sup>

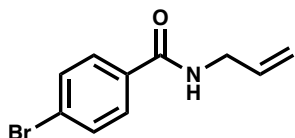

*N*-allyl-4-bromobenzamide was prepared according to literature procedure. Spectral data matched that reported in the literature.<sup>3</sup>

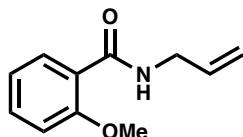

*N*-allyl-2-methoxybenzamide was prepared according to literature procedure. Spectral data matched that reported in the literature.<sup>4</sup>

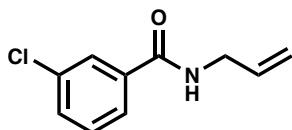

*N*-allyl-3-chlorobenzamide was prepared according to literature procedure. Spectral data matched that reported in the literature.<sup>2</sup>

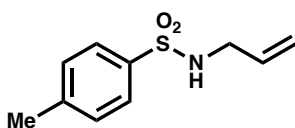

*N*-allyl-4-methylbenzenesulfonamide was prepared according to literature procedure. Spectral data matched that reported in the literature.<sup>5</sup>

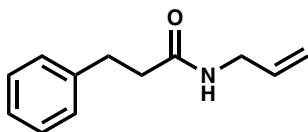

*N*-allyl-3-phenylpropanamide was prepared according to literature procedure. Spectral data matched that reported in the literature.<sup>6</sup>

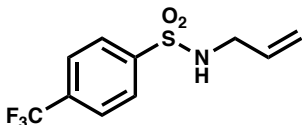

*N*-allyl-4-(trifluoromethyl)benzenesulfonamide was prepared according to literature procedure. Spectral data matched that reported in the literature.<sup>7</sup>

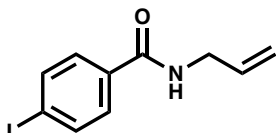

*N*-allyl-4-iodobenzamide was prepared according to literature procedure.<sup>3</sup> Spectral data matched that reported in the literature.<sup>8</sup>

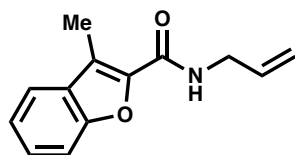

*N*-allyl-3-methylbenzofuran-2-carboxamide was prepared according to literature procedure.<sup>3</sup> <sup>1</sup>H NMR (600 MHz, Chloroform-*d*)  $\delta$  7.62 (dt,  $J = 7.9, 1.0$  Hz, 1H), 7.47 – 7.42 (m, 1H), 7.42 (ddd,

$J = 8.3, 6.8, 1.2$  Hz, 1H), 7.30 (ddd,  $J = 8.0, 6.8, 1.3$  Hz, 1H), 6.72 (s, 1H), 5.96 (ddt,  $J = 17.0, 10.2, 5.7$  Hz, 1H), 5.31 (dq,  $J = 17.1, 1.6$  Hz, 1H), 5.21 (dq,  $J = 10.2, 1.4$  Hz, 1H), 4.11 (tt,  $J = 5.8, 1.6$  Hz, 2H), 2.64 (s, 2H).  $^{13}\text{C}$  NMR (151 MHz, Chloroform- $d$ )  $\delta$  159.70, 152.79, 142.17, 133.58, 129.32, 126.56, 122.63, 122.04, 120.49, 116.26, 111.01, 40.93, 8.45. LCMS: found 216.1 (M+H), calc'd 216.1 (M+H).

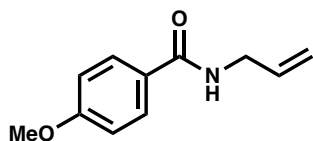

*N*-allyl-4-methoxybenzamide was prepared according to literature procedure. Spectral data matched that reported.<sup>9</sup>

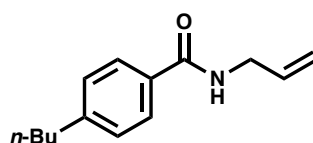

*N*-allyl-4-butylbenzamide was prepared according to literature procedure.<sup>3</sup>  $^1\text{H}$  NMR (600 MHz, Chloroform- $d$ )  $\delta$  7.72 – 7.67 (m, 2H), 7.26 – 7.21 (m, 2H), 6.16 (s, 1H), 5.94 (ddtd,  $J = 16.9, 10.2, 5.7, 1.0$  Hz, 1H), 5.26 (dp,  $J = 17.1, 1.4$  Hz, 1H), 5.18 (dp,  $J = 10.1, 1.4$  Hz, 1H), 4.09 (tq,  $J = 5.8, 1.5$  Hz, 2H), 2.68 – 2.62 (m, 2H), 1.64 – 1.56 (m, 2H), 1.35 (dq,  $J = 14.7, 7.4$  Hz, 2H), 0.92 (t,  $J = 7.4$  Hz, 3H).  $^{13}\text{C}$  NMR (151 MHz, Chloroform- $d$ )  $\delta$  146.44, 133.84, 126.44, 116.17, 41.92, 35.06, 32.89, 21.83, 13.45. LCMS: found 218.1 (M+H), calc'd 218.2 (M+H)

### 3. Olefin Hydrogenation

General procedure with  $\text{AlCl}_3$ : This reaction may be carried out under ambient temperature and atmosphere. The olefin (0.2 mmol) (if solid), Mn powder (33 mg, 0.3 mmol),  $\text{Co}(\text{OAc})_2 \cdot 4\text{H}_2\text{O}$  (14.2 mg, 30 mol%) and  $\text{AlCl}_3$  (26.6 mg, 0.2 mmol) are weighed out and added to a 5 mL one-dram vial equipped with a stirring bar. A cap is placed on the reaction vessel and *i*-PrOH (2 mL) is added. The reaction is stirred vigorously for 4-20 h at rt. The reaction initially turns blue and over time turns black. The mixture is diluted with  $\text{CH}_2\text{Cl}_2$ , poured into a separating funnel and quenched with saturated aqueous  $\text{NaHCO}_3$  solution. After phase separation the aqueous phase is extracted twice further with  $\text{CH}_2\text{Cl}_2$ . The combined organic phases are washed with brine, dried over  $\text{MgSO}_4$  and filtered through a short plug of silica gel. The solvent is removed *in vacuo* to furnish the hydrogenated product without the need for further purification.

General procedure with HCl: This reaction may be carried out under ambient temperature and atmosphere. A solution of concentrated (12.5 M) HCl is diluted with *i*-PrOH to approximate concentration 1–2M. 0.10 mL of this HCl/*i*-PrOH is diluted with DI  $\text{H}_2\text{O}$ . The resulting solution is titrated with a freshly prepared solution of ~1M NaOH (aqueous) to determine concentration, using pH strips (Cytiva Whatman pH Indicator Papers, pH range 0-14) to monitor for equivalence point. The olefin (0.1 mmol) (if solid), Mn powder (16.5 mg, 0.3 mmol), and  $\text{Co}(\text{OAc})_2 \cdot 4\text{H}_2\text{O}$  (7.5 mg, 30 mol%) are weighed out and added to a 5 mL one-dram vial equipped with a stirring bar. A cap is placed on the reaction vessel and *i*-PrOH (2 mL), followed by HCl/*i*-PrOH solution (2 equiv) is added. The reaction is stirred vigorously for 4-20 h at rt. The reaction initially turns blue and over time turns grey. The mixture is diluted with  $\text{CH}_2\text{Cl}_2$ , poured into a separating funnel and quenched

with saturated aqueous NaHCO<sub>3</sub> solution. After phase separation the aqueous phase is extracted twice further with CH<sub>2</sub>Cl<sub>2</sub>. The combined organic phases are washed with brine, dried over MgSO<sub>4</sub> and filtered through a short plug of silica gel. The solvent is removed *in vacuo* to furnish the hydrogenated product without the need for further purification.

#### 4. Olefin Hydrogenation products

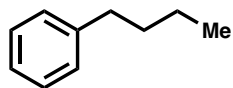

Butylbenzene. The spectral data was in agreement with the literature.<sup>10</sup>

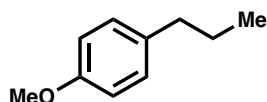

1-methoxy-4-propylbenzene. The spectral data was in agreement with the literature.<sup>11</sup>

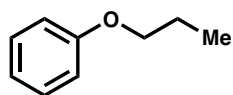

Propoxybenzene. The spectral data was in agreement with the literature.<sup>12</sup>

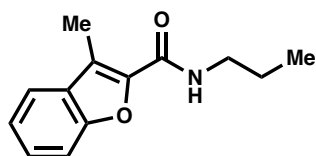

3-methyl-*N*-propylbenzofuran-2-carboxamide. <sup>1</sup>H NMR (400 MHz) CDCl<sub>3</sub>: 7.64 (d, *J* = 7.8 Hz, 1H, Ar-H), 7.49-7.40 (m, 2H, Ar-H), 7.35-7.29 (m, 1H, Ar-H), 3.46 (app-q, 2H, CH<sub>2</sub>), 1.70 (app-h, 2H, CH<sub>2</sub>), 1.04 (t, *J* = 7.4 Hz, 3H, CH<sub>3</sub>). <sup>13</sup>C NMR (151 MHz, Chloroform-*d*) δ 159.70, 152.79, 142.17, 133.58, 129.32, 126.56, 122.63, 122.04, 120.49, 116.26, 111.01, 40.93, 8.45. LCMS: found 216.1 (M+H), Calc'd 216.1 (M+H)

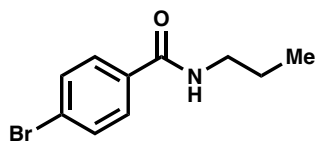

4-bromo-*N*-propylbenzamide. The spectral data was in agreement with the literature.<sup>13</sup>

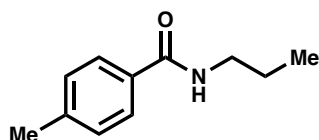

4-methyl-*N*-propylbenzamide. The spectral data was in agreement with the literature.<sup>14</sup>

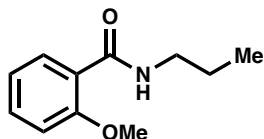

2-methoxy-*N*-propylbenzamide. The spectral data was in agreement with the literature.<sup>15</sup>

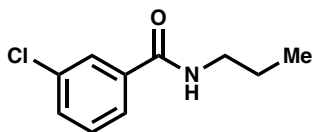

3-chloro-*N*-propylbenzamide. The spectral data was in agreement with the literature.<sup>16</sup>

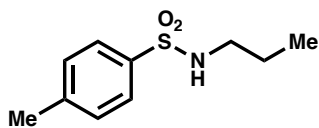

4-methyl-*N*-propylbenzenesulfonamide. The spectral data was in agreement with the literature.<sup>17</sup>

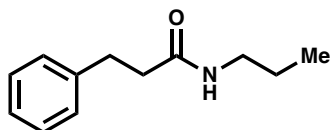

3-Phenyl-*N*-propylpropanamide. The spectral data was in agreement with the literature.<sup>18</sup>

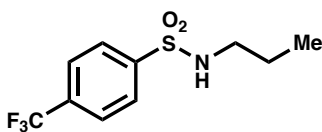

*N*-propyl-4-(trifluoromethyl)benzenesulfonamide. <sup>1</sup>H NMR (400 MHz) CDCl<sub>3</sub>: 8.03 (d, *J* = 8.2 Hz, 2H, Ar-H), 7.81 (d, *J* = 8.2 Hz, 2H, Ar-H), 4.95 (t, *J* = 5.9 Hz, 1H, NH), 2.97 (app-q, 2H, CH<sub>2</sub>), 1.52 (app-h, 2H, CH<sub>2</sub>), 0.90 (t, *J* = 7.4 Hz, 3H, CH<sub>3</sub>). <sup>13</sup>C NMR (151 MHz, Chloroform-*d*) δ 143.30, 127.09, 125.85, 125.82, 125.80, 44.60, 22.59, 10.58. LCMS: found 268.0 (M+H), 268.1 calc'd (M+H).

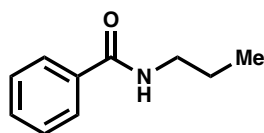

*N*-propylbenzamide. The spectral data was in agreement with the literature.<sup>19</sup>

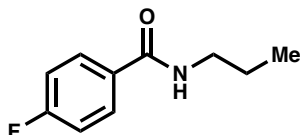

4-Fluoro-*N*-propylbenzamide. The spectral data was in agreement with the literature.<sup>20</sup>

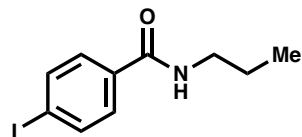

4-iodo-*N*-propylbenzamide. The spectral data was in agreement with the literature.<sup>21</sup>

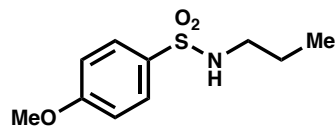

4-methoxy-*N*-propylbenzenesulfonamide. The spectral data was in agreement with the literature.<sup>22</sup>

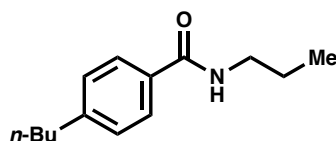

4-butyl-*N*-propylbenzamide. <sup>1</sup>H NMR (600 MHz, Chloroform-*d*) δ 7.70 – 7.64 (m, 2H), 7.26 – 7.21 (m, 2H), 6.07 (s, 1H), 3.42 (ddd, *J* = 7.8, 7.1, 5.9 Hz, 2H), 2.67 – 2.62 (m, 2H), 1.67 – 1.58 (m, 4H), 1.35 (dt, *J* = 14.9, 7.4 Hz, 2H), 0.99 (t, *J* = 7.4 Hz, 3H), 0.92 (t, *J* = 7.4 Hz, 3H). <sup>13</sup>C NMR (151 MHz, Chloroform-*d*) δ 167.07, 146.19, 131.78, 128.12, 126.36, 41.24, 35.04, 32.91, 22.53, 21.83, 13.45, 10.99. LCMS: found 220.1 (M+H), calc'd 220.2 (M+H)

## 5. Unsuccessful Substrates

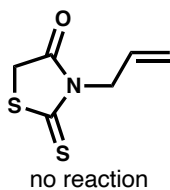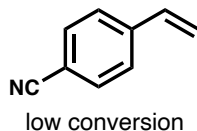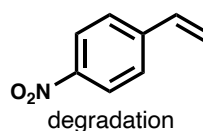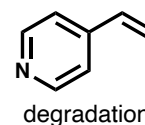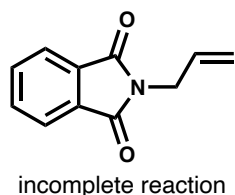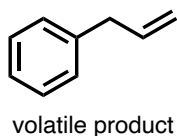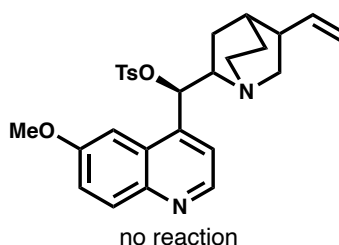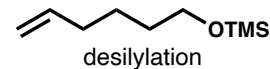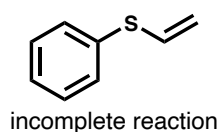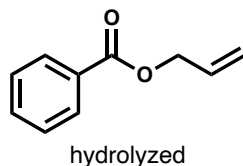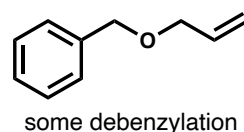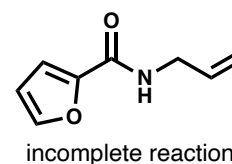

## 6. Mechanistic Studies

A. Cyclization study: This reaction may be carried out under ambient temperature and atmosphere. Mn powder (16.5 mg, 0.3 mmol), Co(OAc)<sub>2</sub>•4H<sub>2</sub>O (6.5 mg, 30 mol%) and AlCl<sub>3</sub> (13.3 mg, 0.1



mmol) are weighed out and added to a 5 mL one-dram vial equipped with a stirring bar. A septum cap is placed on the reaction vessel and *i*-PrOH (1 mL) is added. Allyl ether (12  $\mu$ L, 0.1 mmol) is added via syringe through septum. The reaction is stirred vigorously for 4 h at rt. 10  $\mu$ L of reaction solution is diluted with 2 mL EtOAc and filtered through a short plug of silica into a 2 mL vial. The sample is submitted for GC/MS analysis. Only propyl ether is observed, no cyclized product.

B. Reaction purge with argon: Mn powder (16.5 mg, 0.3 mmol), Co(OAc)<sub>2</sub>•4H<sub>2</sub>O (6.5 mg, 30 mol%) and AlCl<sub>3</sub> (13.3 mg, 0.1 mmol) are weighed out and added to a 5 mL one-dram vial equipped with a stirring bar. A septum cap is placed on the reaction vessel and *i*-PrOH (1 mL) is added. Argon is bubbled through the solution slightly above atmospheric pressure (via balloon) for five minutes. 4-phenylbutene (15  $\mu$ L, 0.1 mmol) is added via syringe through septum. The reaction is stirred vigorously for 24 h at rt. 10  $\mu$ L of reaction solution is diluted with 2 mL EtOAc and filtered through a short plug of silica. The sample is submitted for GC/MS analysis. Butylbenzene is detected. No starting material is observed in the chromatogram.

C. Catalytic Mn with hydrogen atmosphere. *N*-allyl-4-bromobenzamide (24 mg, 0.1 mmol), Mn powder (0.6 mg, 0.01 mmol), Co(OAc)<sub>2</sub>•4H<sub>2</sub>O (6.5 mg, 30 mol%) and AlCl<sub>3</sub> (13.3 mg, 0.1 mmol) are weighed out and added to a 5 mL one-dram vial equipped with a stirring bar. A septum cap is placed on the reaction vessel and *i*-PrOH (1 mL) is added. Hydrogen is bubbled through the solution slightly above atmospheric pressure (via balloon) for five minutes. The hydrogen balloon is removed from solution but left inserted through septum to maintain a positive pressure of hydrogen above the reacting solution. The reaction is stirred vigorously for 24 h at rt. 10  $\mu$ L of reaction solution is diluted with 2 mL MeOH and filtered through a short plug of silica. The sample is submitted for LC/MS analysis. No *N*-propyl-4-bromobenzamide is detected.

D. MnCl<sub>2</sub> and PhSiH<sub>3</sub>: This reaction may be carried out under ambient temperature and atmosphere. *N*-allyl-4-bromobenzamide (24 mg, 0.1 mmol), MnCl<sub>2</sub>•4H<sub>2</sub>O powder (59.1 mg, 0.3 mmol), Co(OAc)<sub>2</sub>•4H<sub>2</sub>O (6.5 mg, 30 mol%) are weighed out and added to a 5 mL one-dram vial equipped with a stirring bar. A septum cap is placed on the reaction vessel and *i*-PrOH (1 mL) is added. PhSiH<sub>3</sub> is added. The reaction is stirred vigorously for 24 h at rt. 10  $\mu$ L of reaction solution is diluted with 2 mL MeOH and filtered through a short plug of silica. The sample is submitted for LC/MS analysis. No *N*-propyl-4-bromobenzamide is detected.

## 7. $^1\text{H}$ and $^{13}\text{C}$ NMR Spectra of Novel Compounds

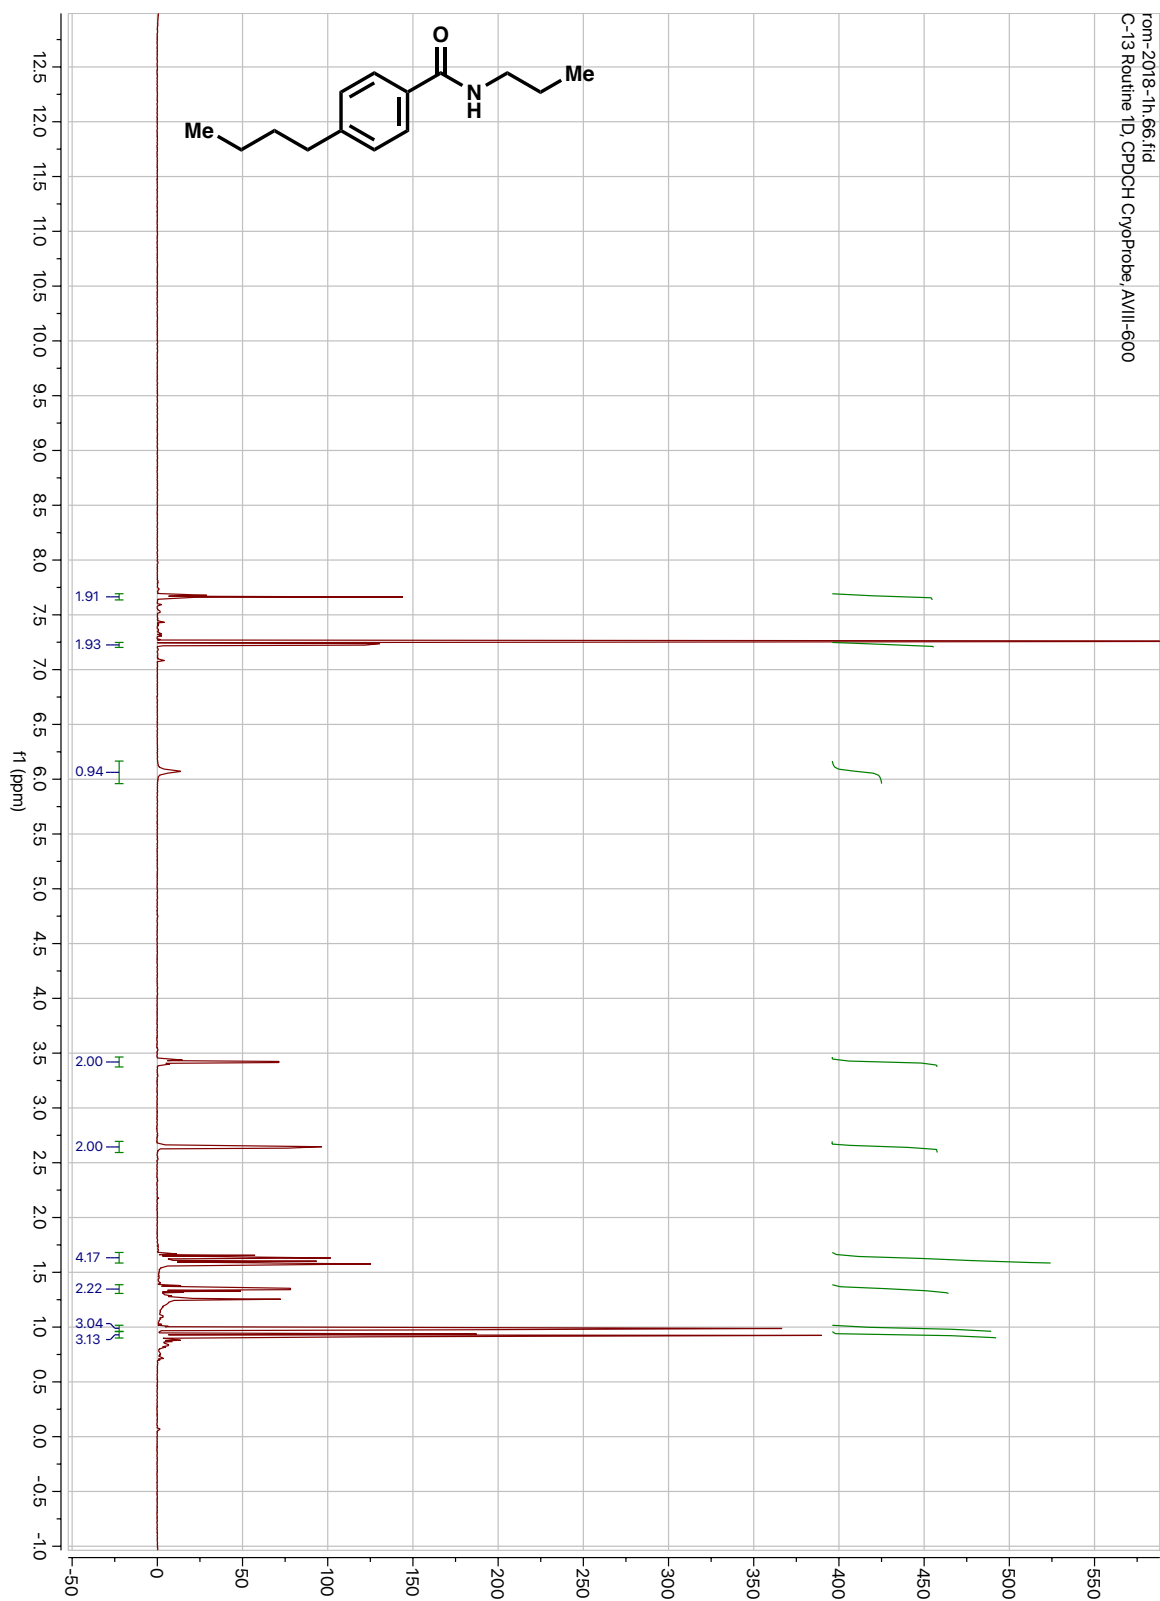

tom-2018.59.fid  
C-13 Routine ID: CPDCH CryoProbe, AVIII-600

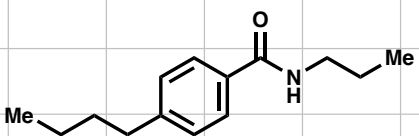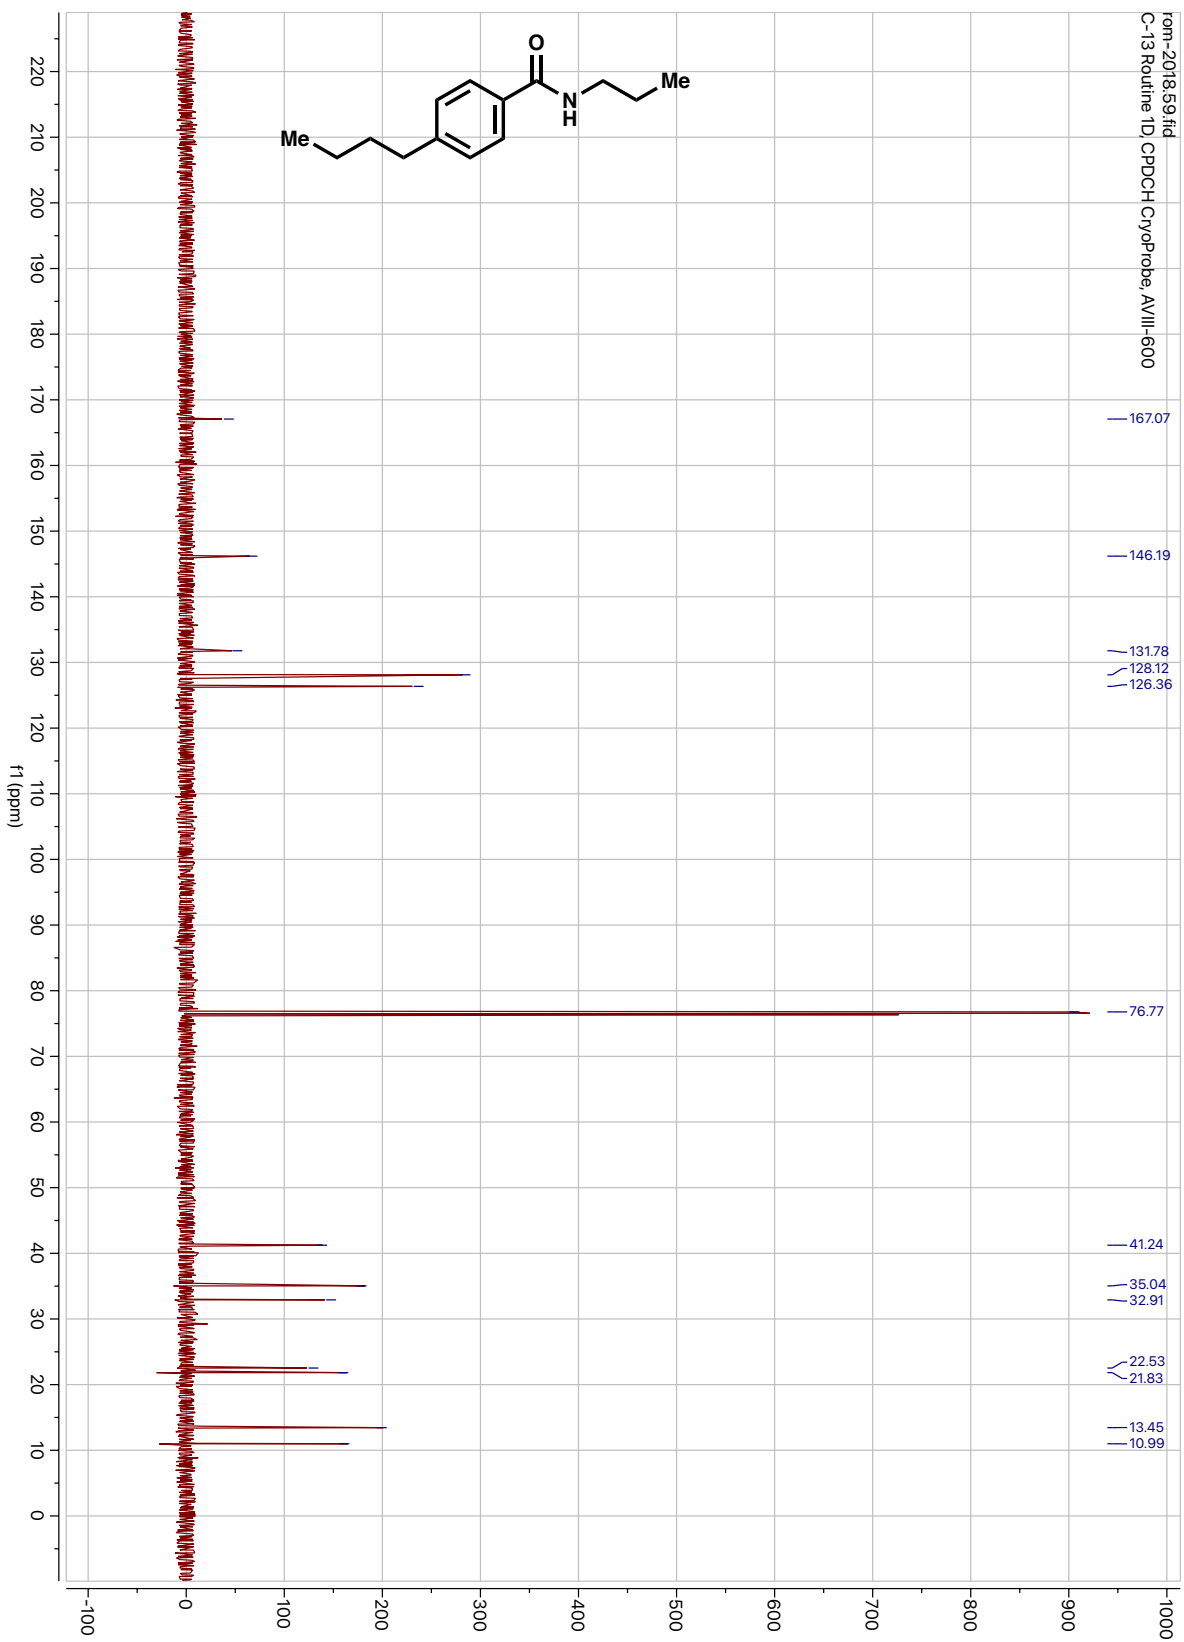

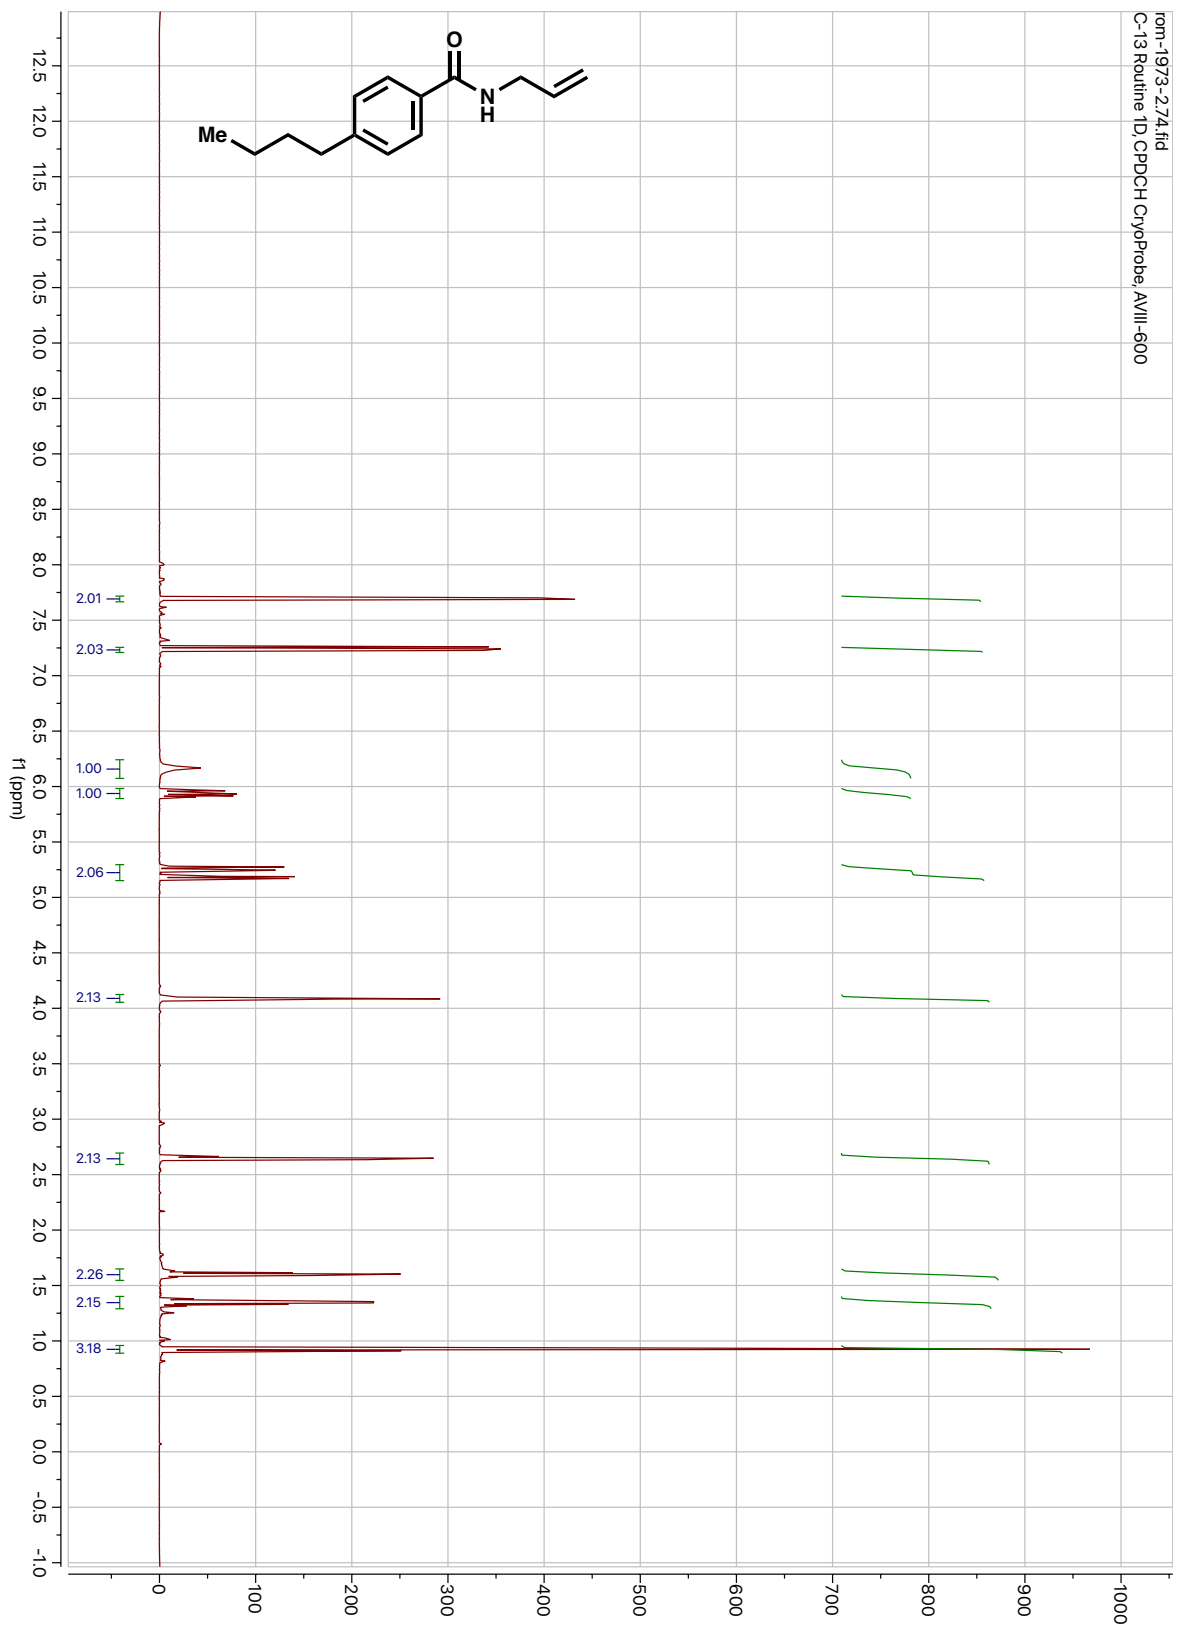

rom-1973-2-136\_75.fid  
C-13 Routine 1D, CPDCH CryoProbe, AVIII-600

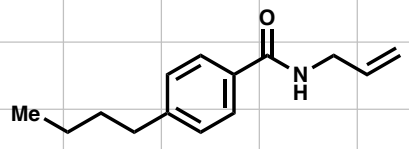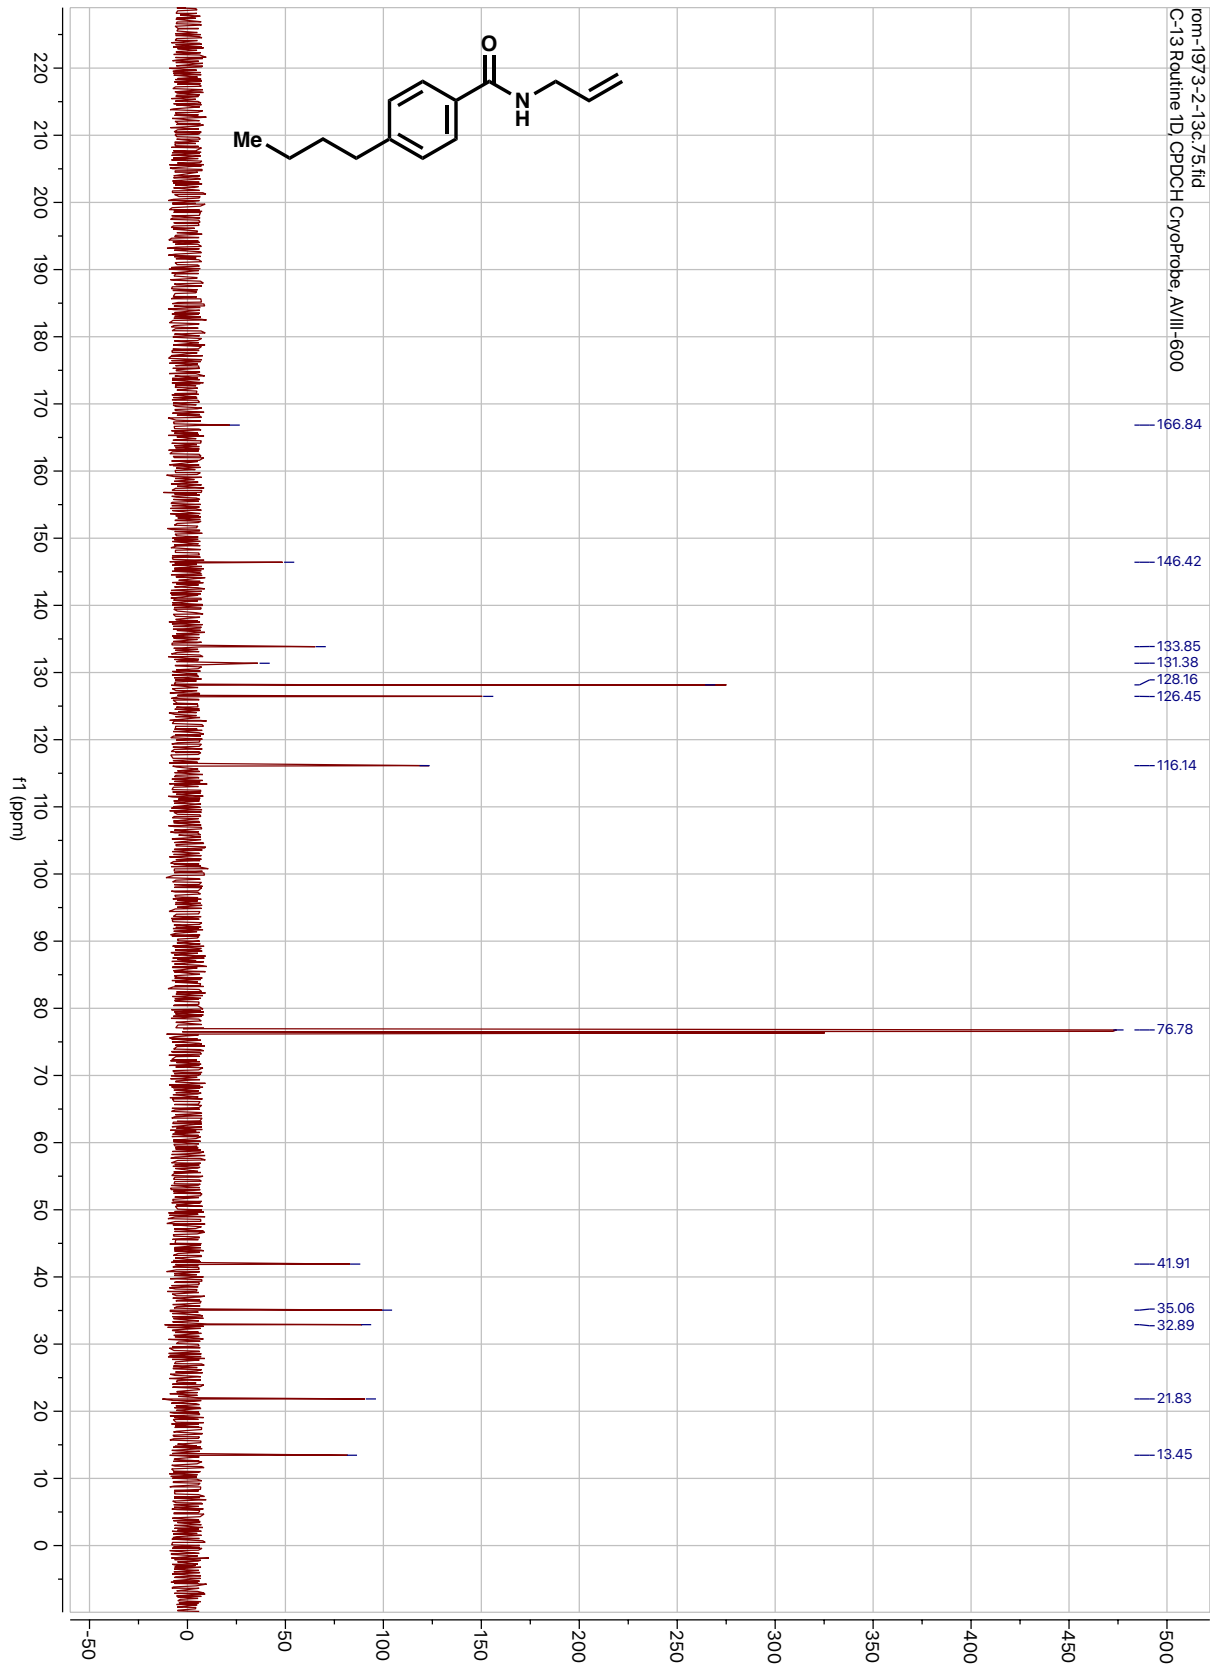

rom-1986-2.80.fid  
C-13 Routine 1D, CPDCH CryoProbe, AVIII-600

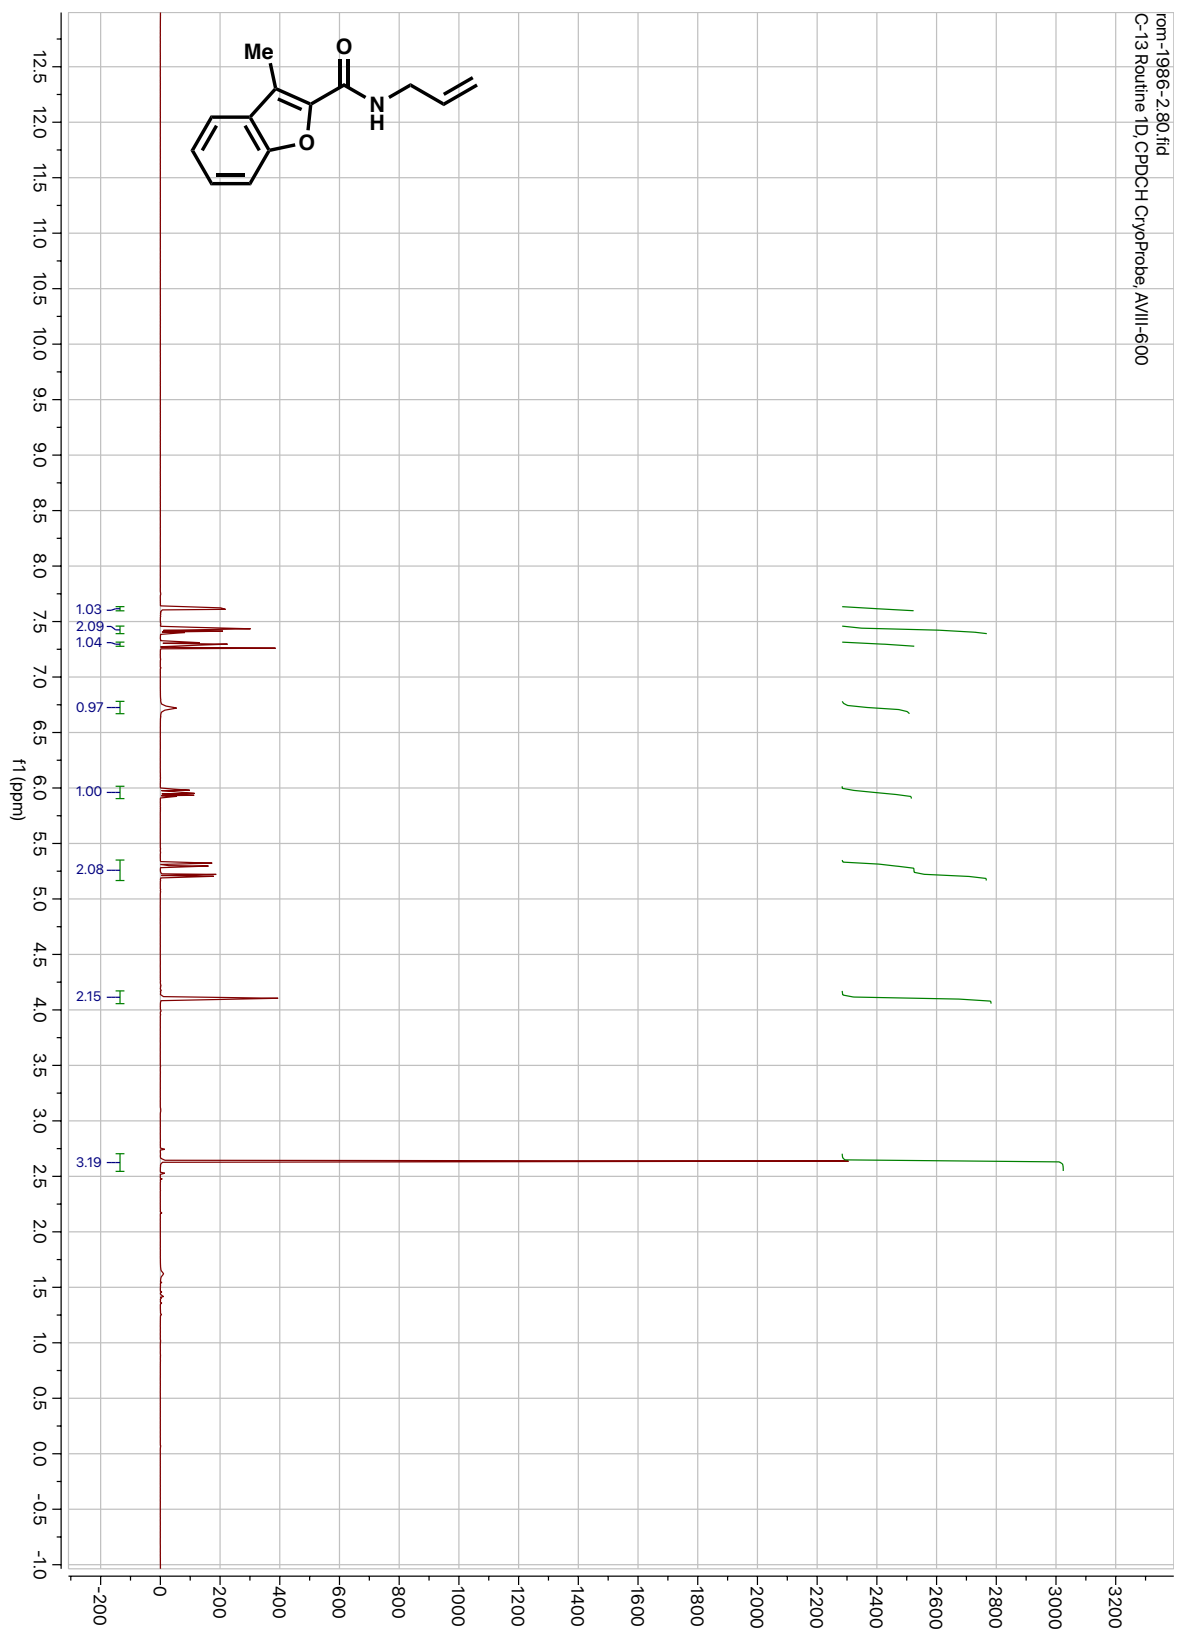

rom-1986-2-13c-81.fid  
C-13 Routine 1D CPDCH CryoProbe, AVIII-600

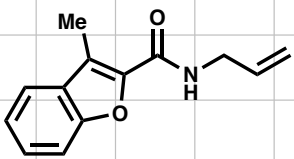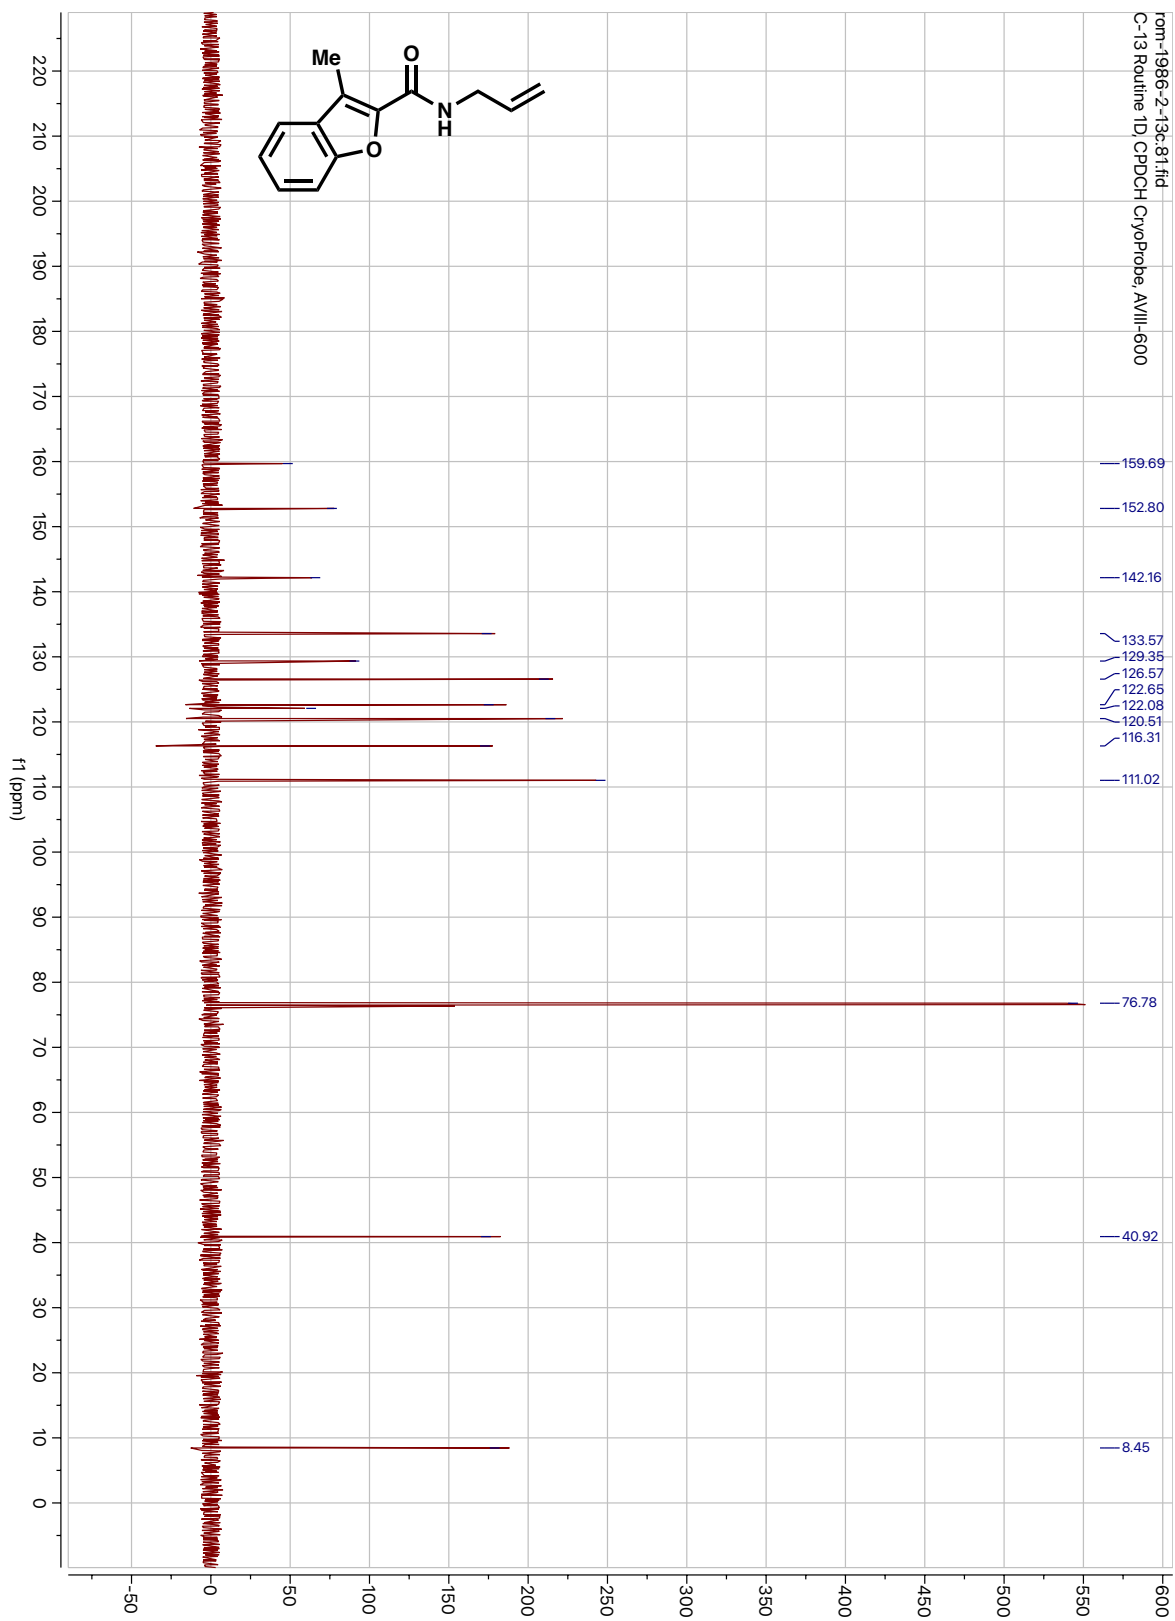

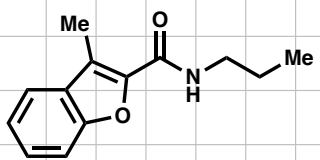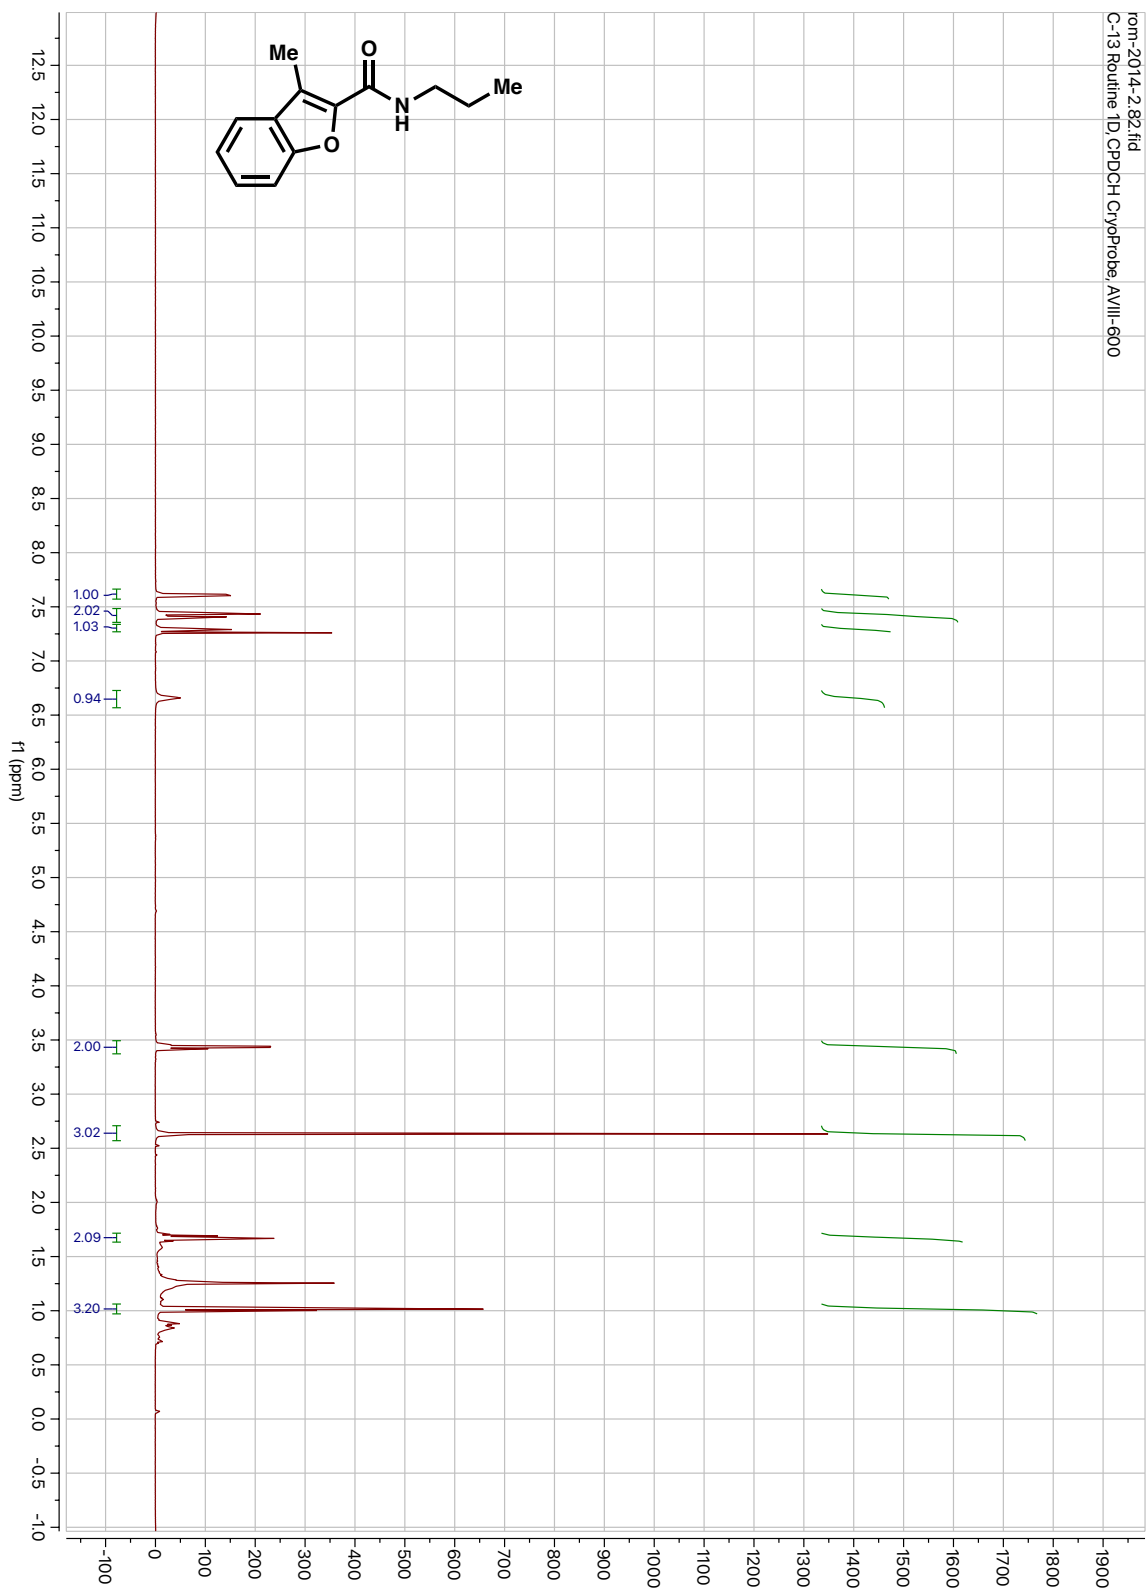



tom-2014-2-13c:83.fid  
C-13 Routine ID: CPDCH Cyo/Probe, AVII-600

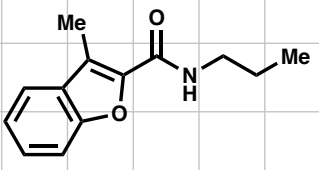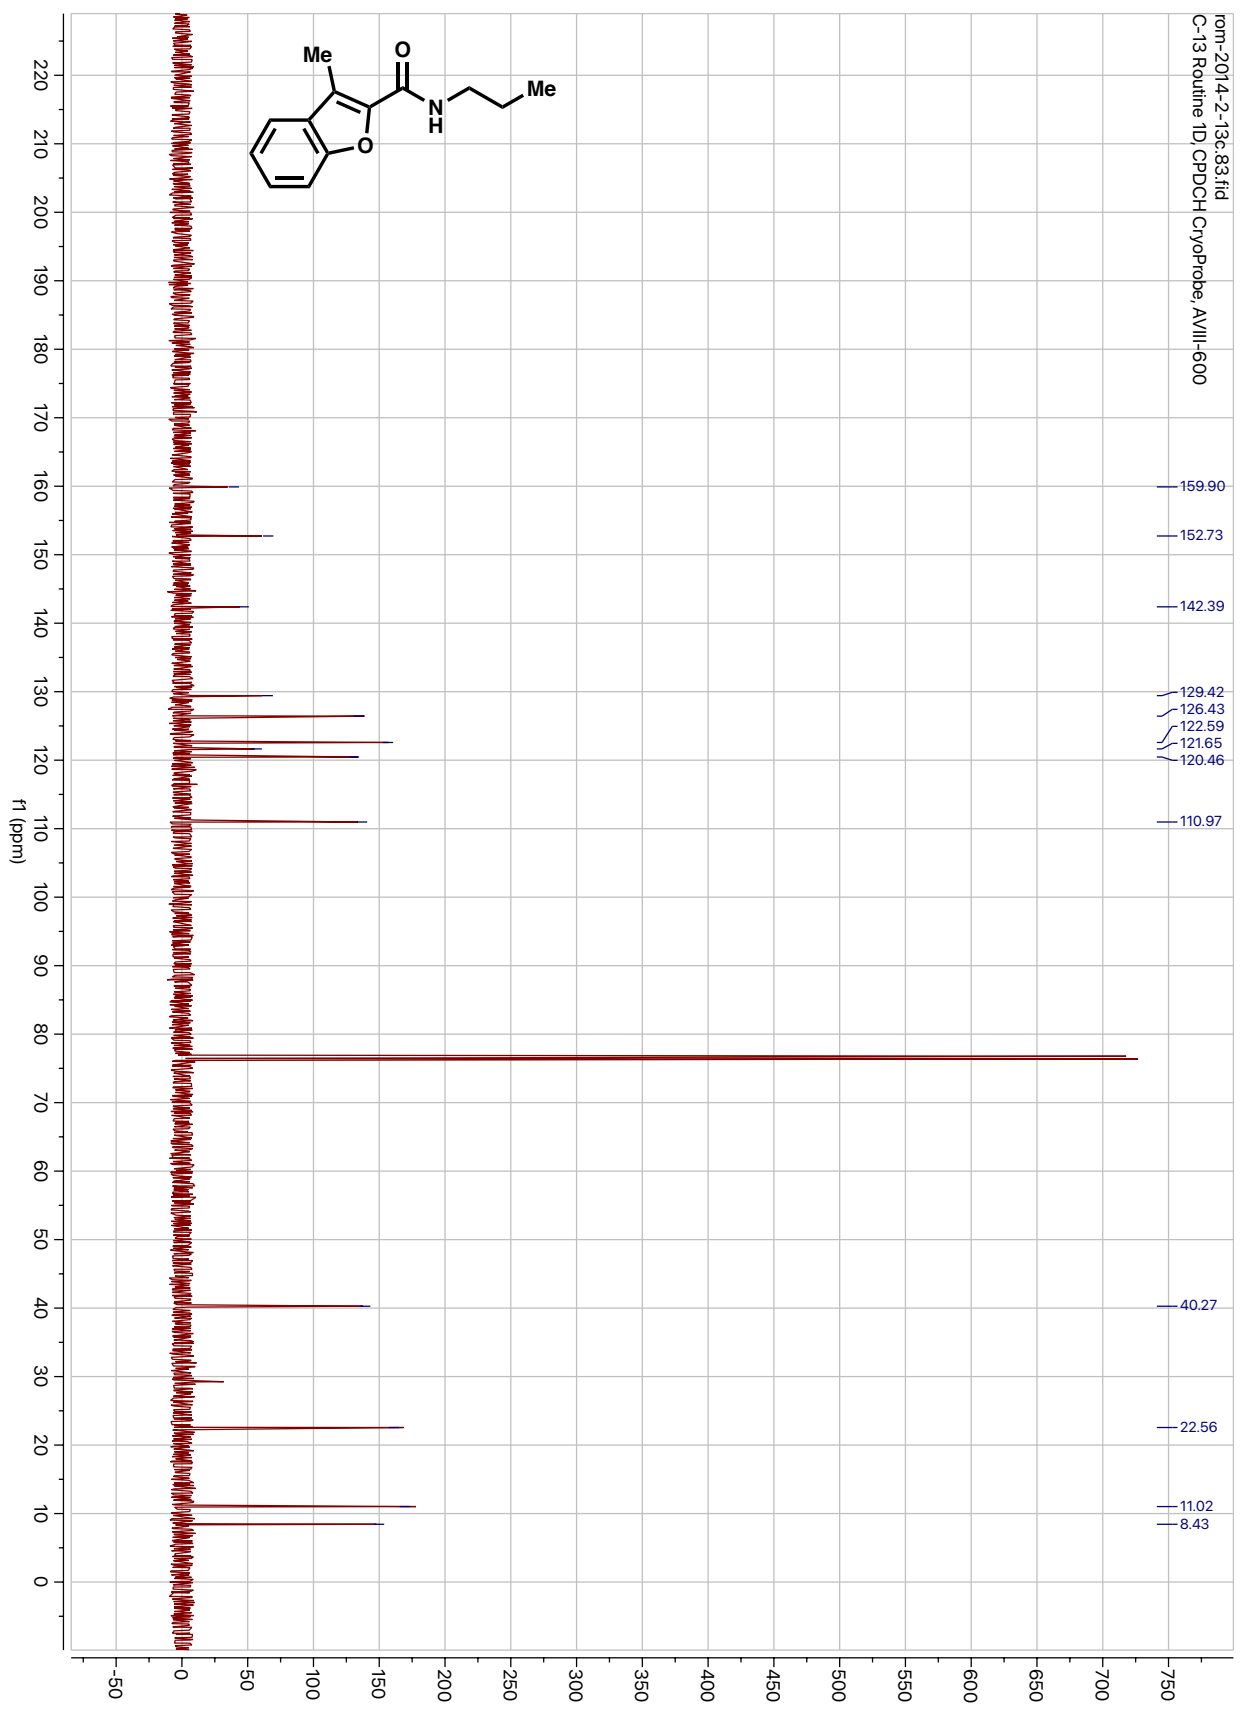

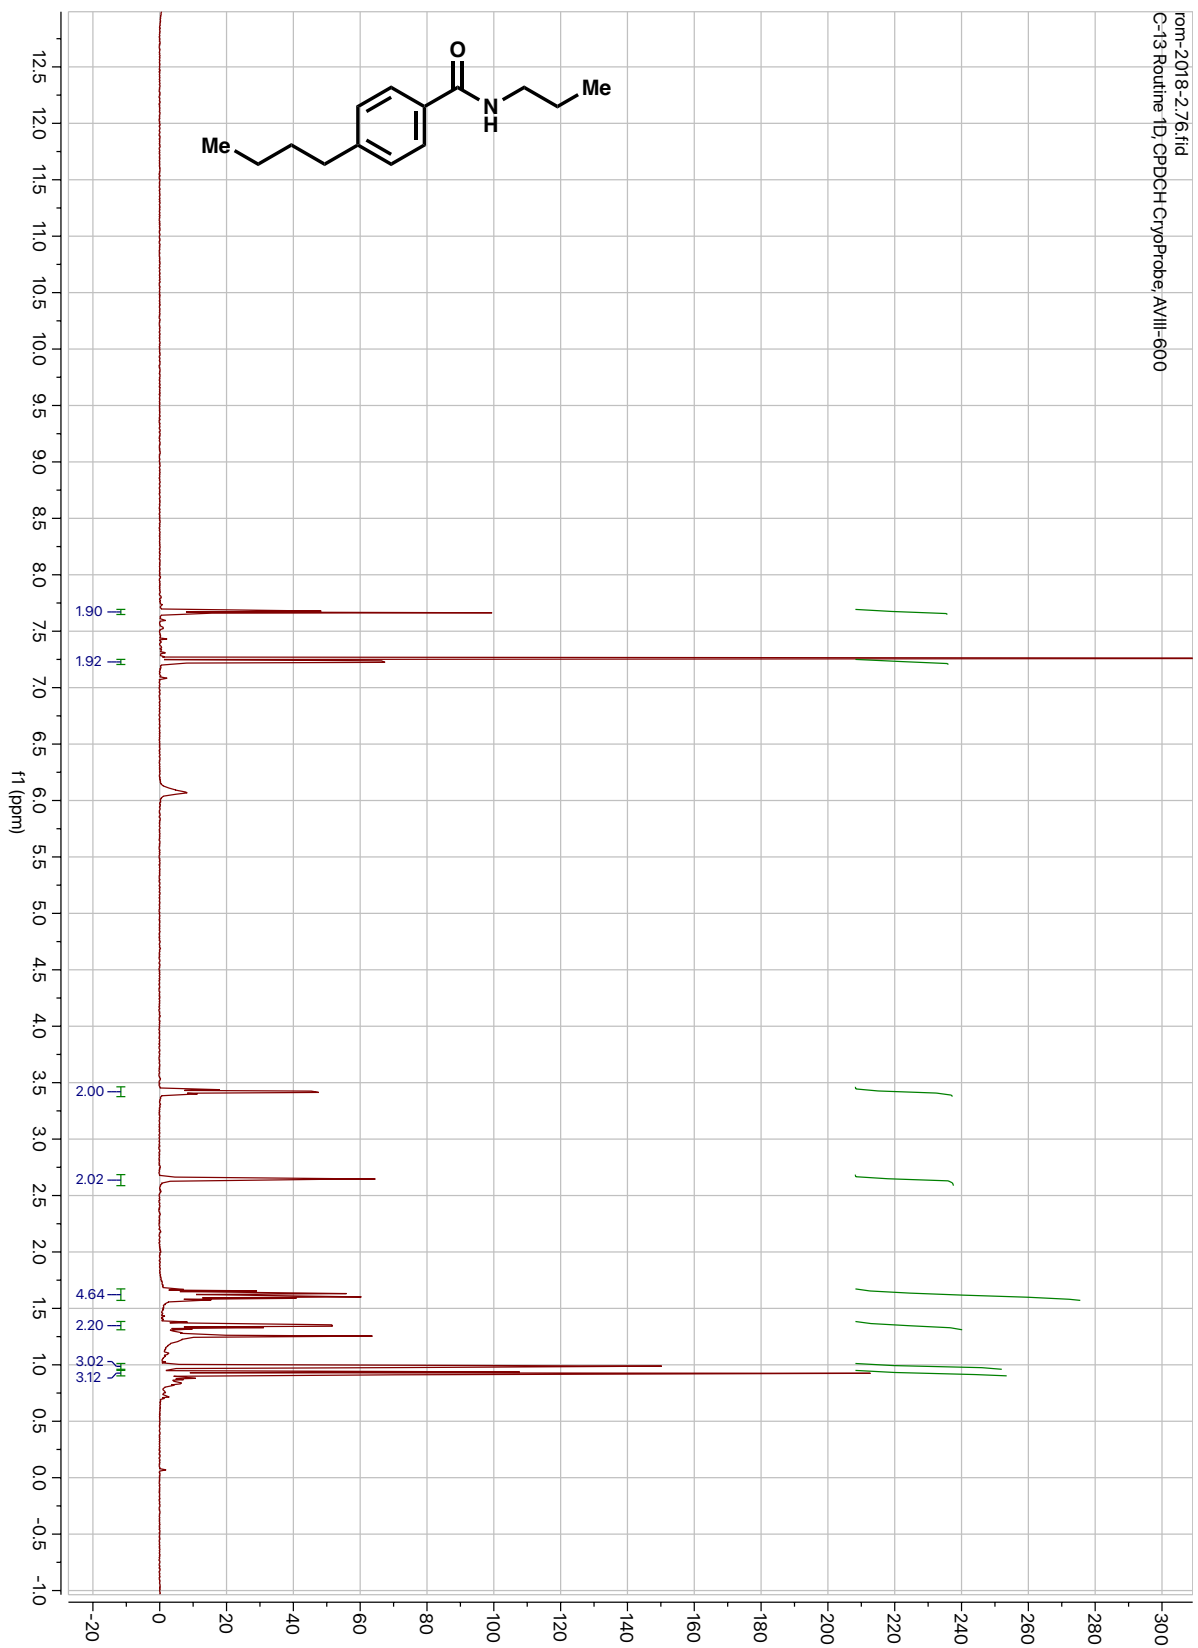

tom-2018-2-13c;77.fid  
C-13 Routine ID: CPDCH CryoProbe, AVIII-600

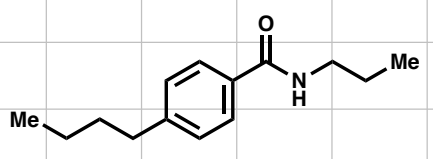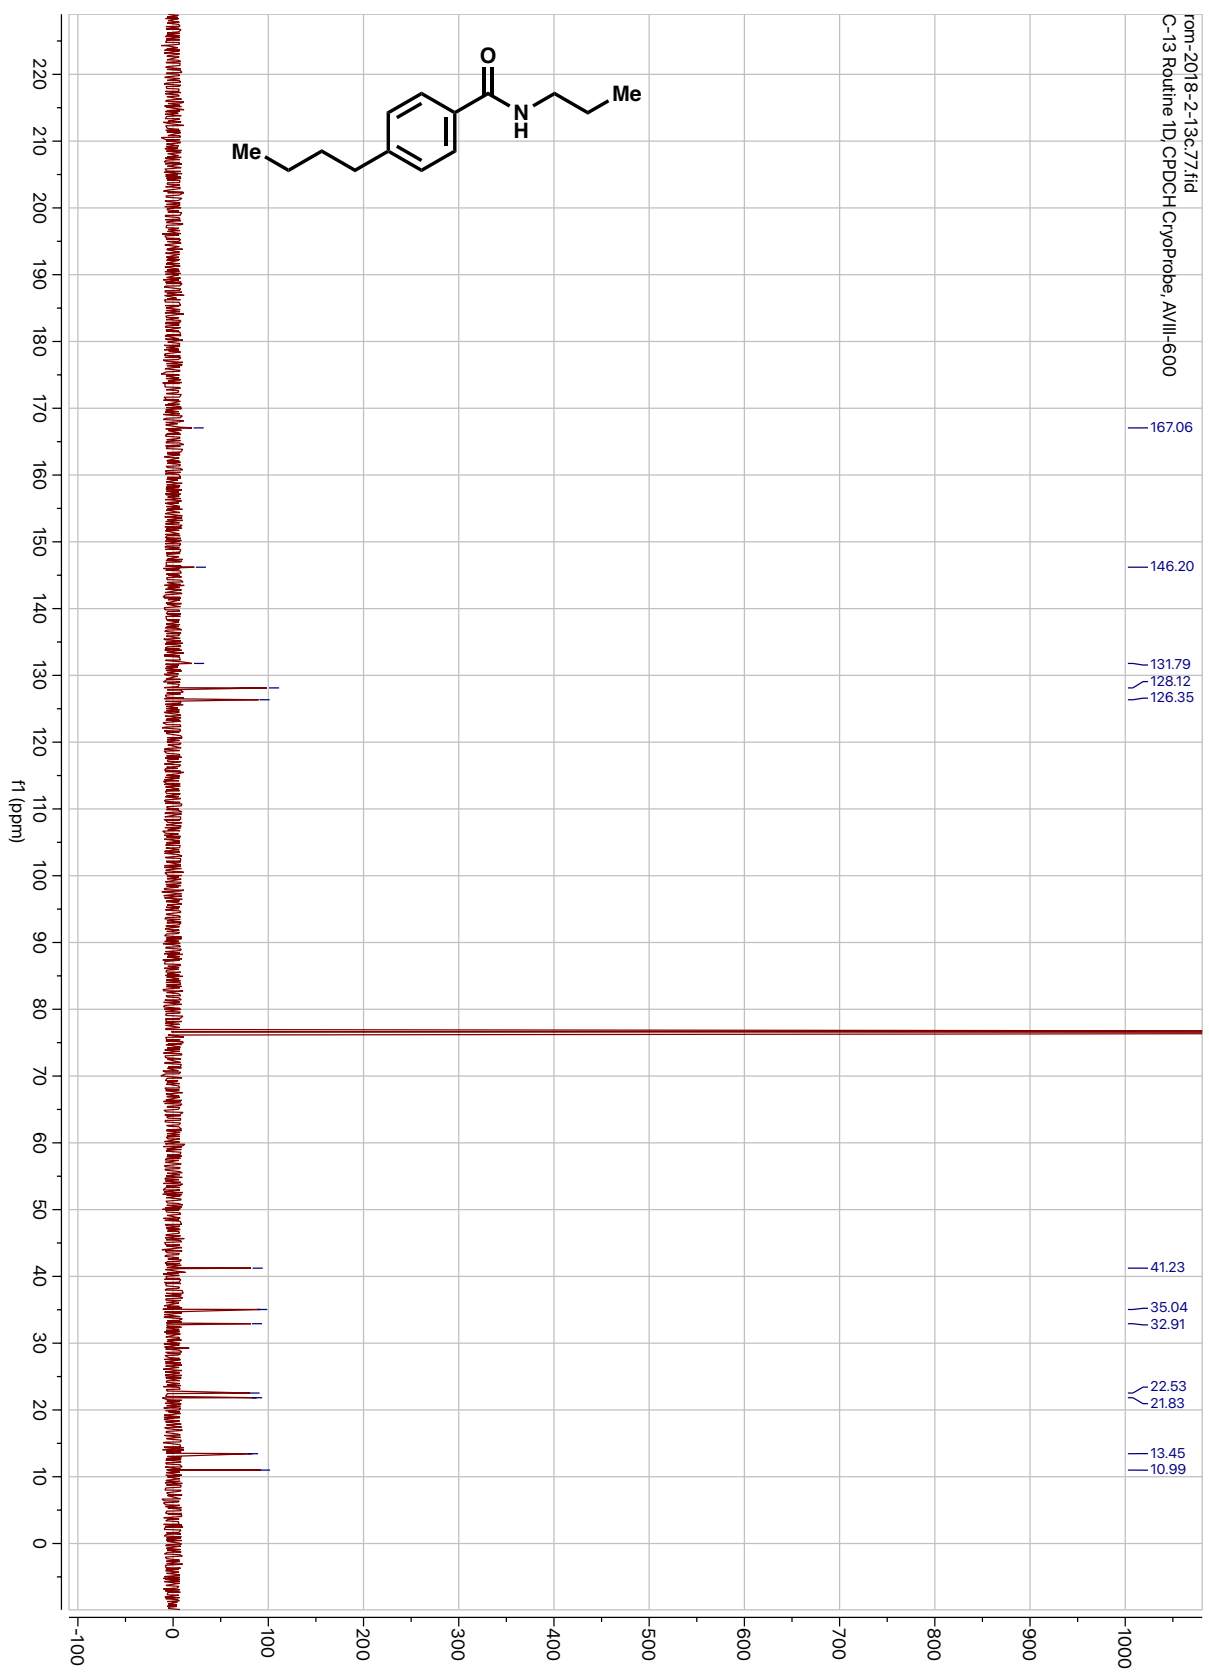

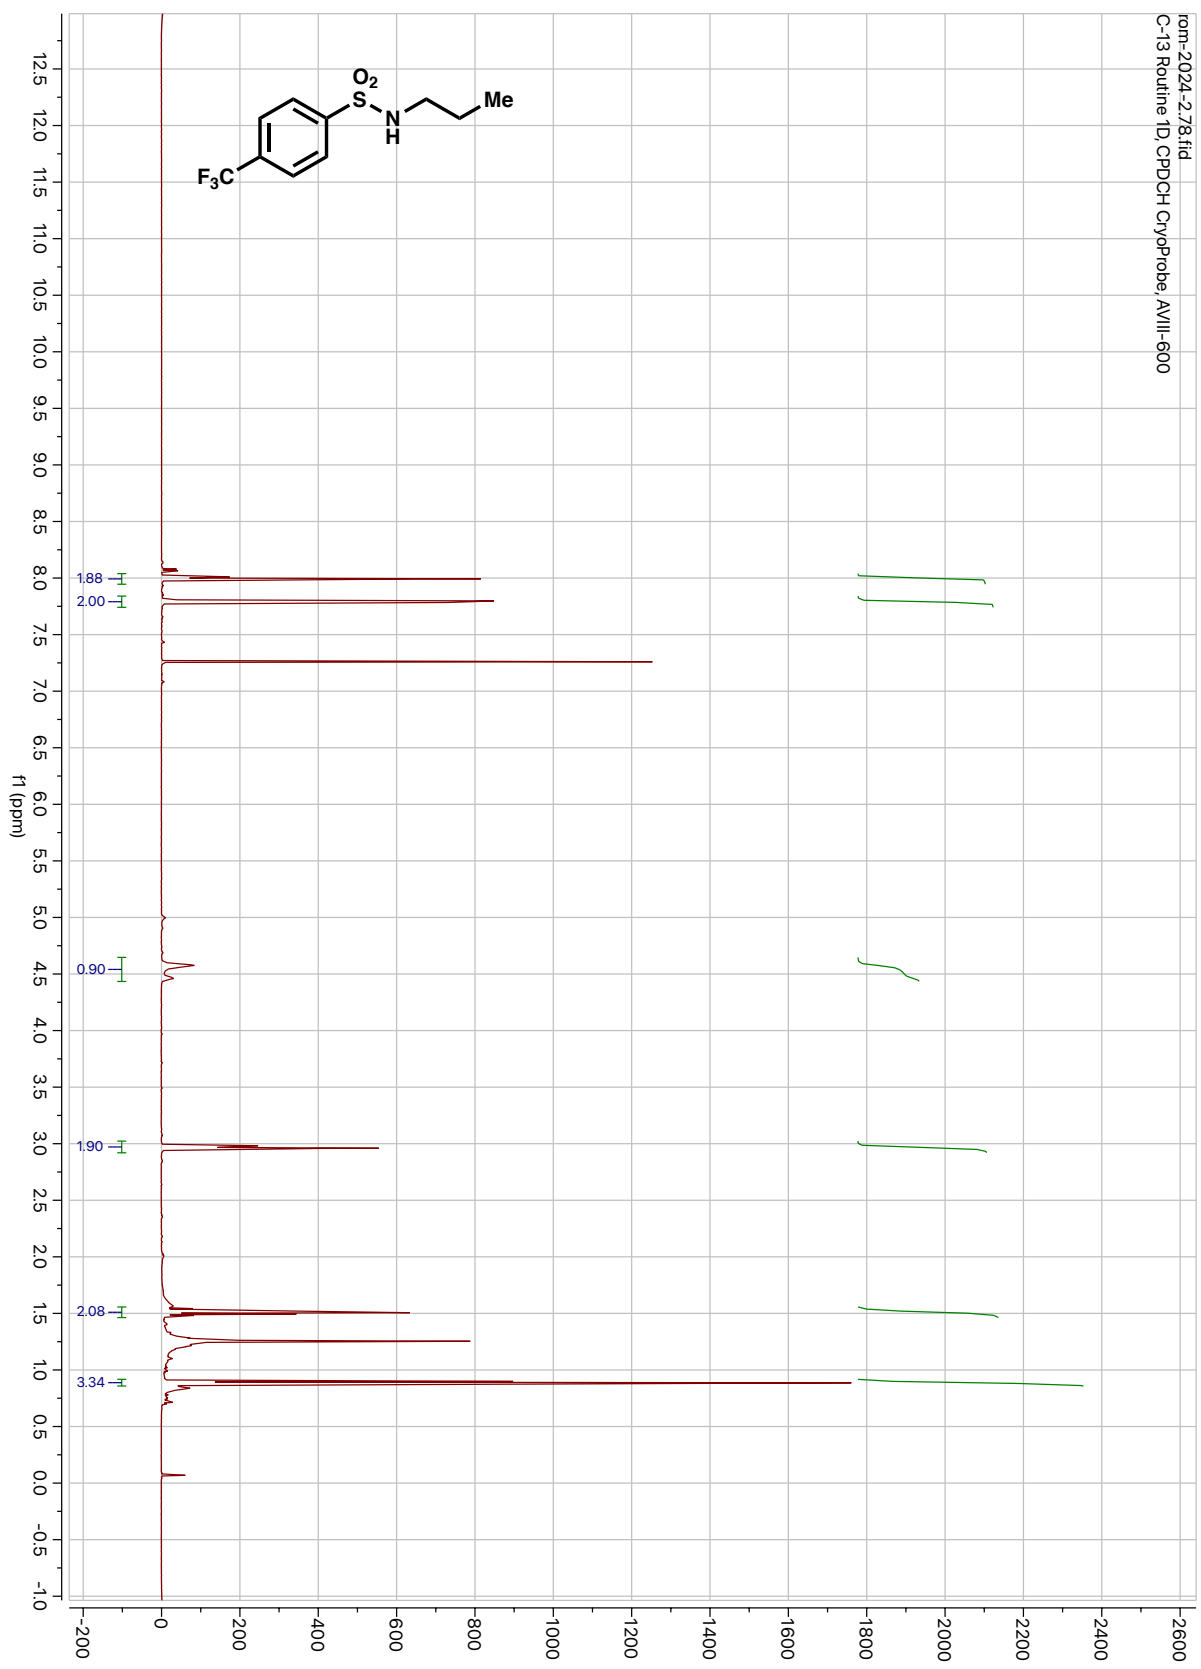

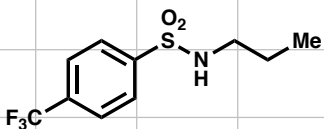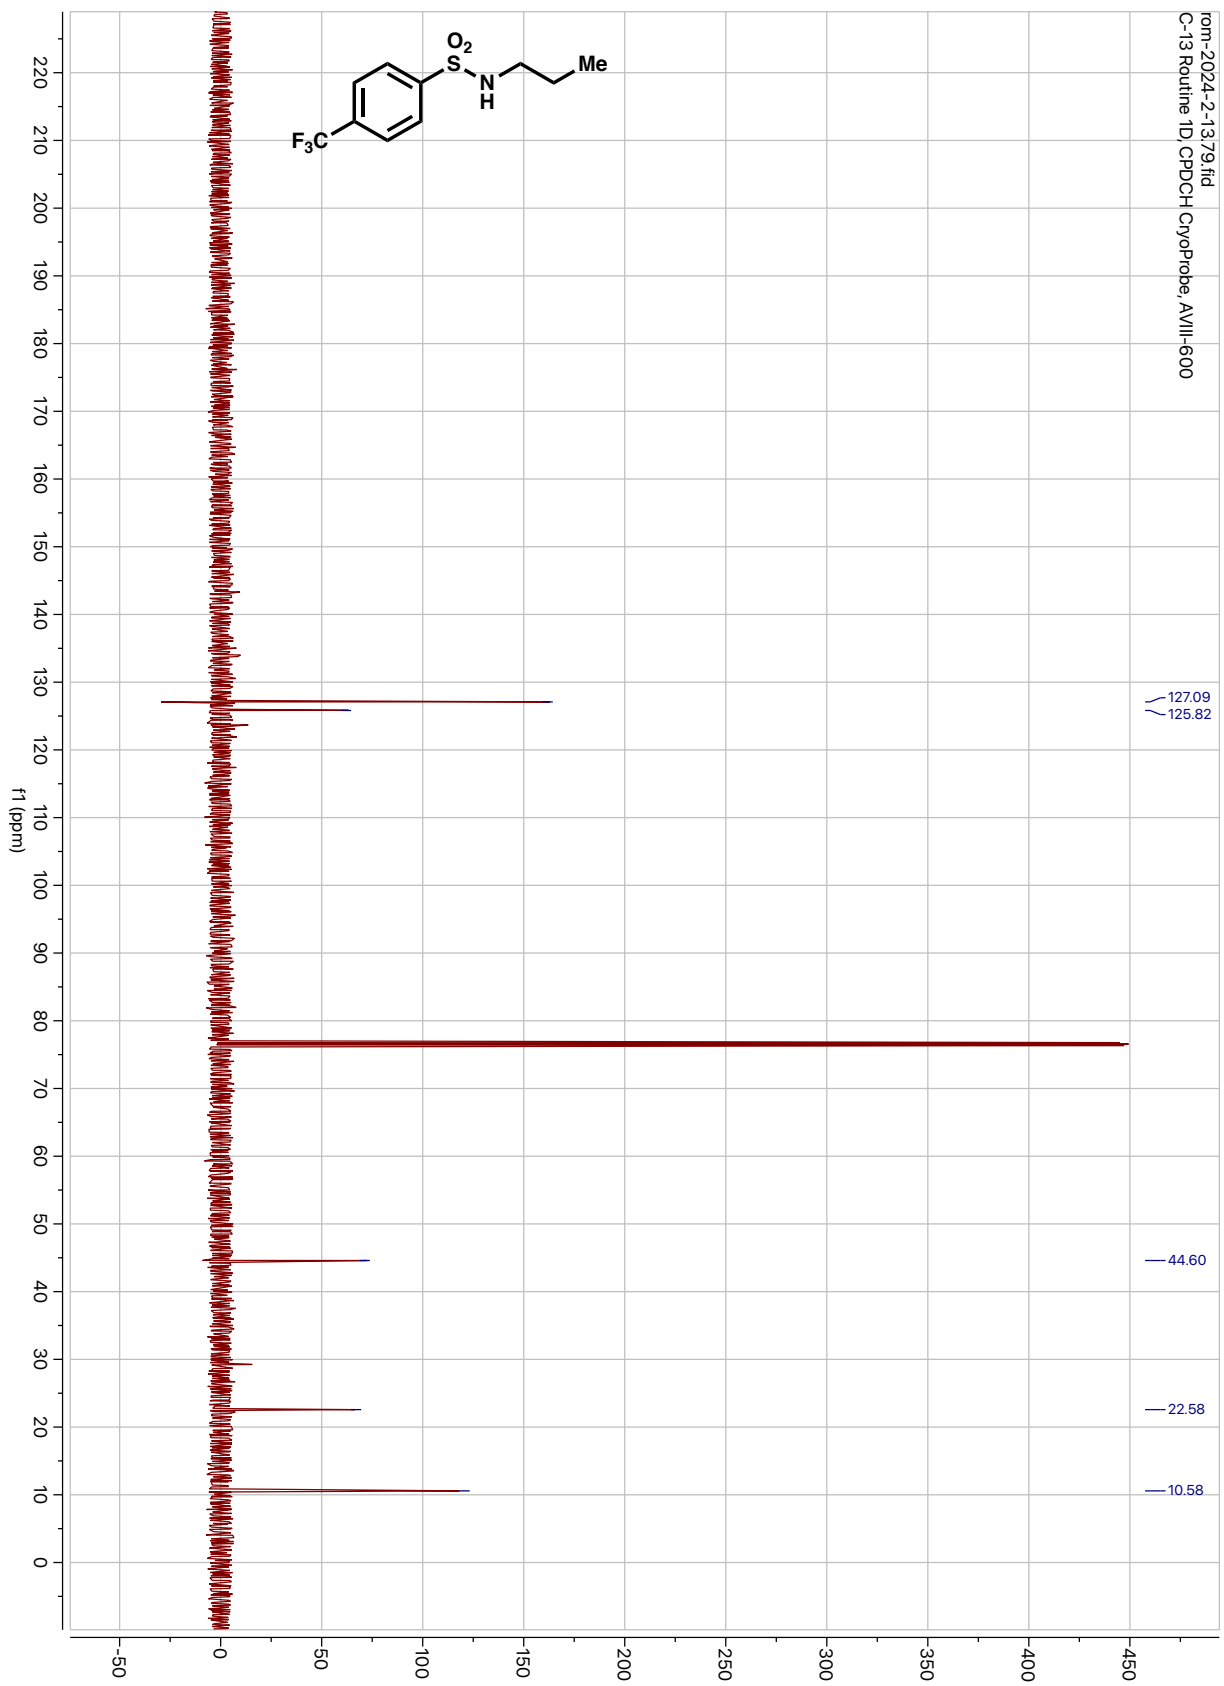

## 8. References

---

1. Emmerich, J.; van Koppen, C. J.; Burkhart, J. L.; Hu, Q.; Siebenbürger, L.; Boerger, C.; Scheuer, C.; Laschke, M. W.; Menger, M. D.; Hartmann, R. W. “Lead Optimization Generates CYP11B1 Inhibitors of Pyridylmethyl Isoxazole Type with Improved Pharmacological Profile for the Treatment of Cushing’s Disease” *J. Med. Chem.* **2017**, *60*, 5086–5098.
2. Haupt, J. D.; Berger, M.; Waldvogel, S. R. “Electrochemical Fluorocyclization of N-Allylcarboxamides to 2-Oxazolines by Hypervalent Iodine Mediator” *Org. Lett.* **2019**, *21*, 242–245.
3. Gilbert, A.; Bertrand, X.; Paquin, J.-F. “Silver-Promoted Synthesis of 5-[(Pentafluorosulfanyl)methyl]-2-oxazolines” *Org. Lett.* **2018**, *20*, 7257–7260.
4. Cadierno, V.; Gimeno, J.; Nebra, N. “Efficient Tandem Process for the Catalytic Deprotection of N-Allyl Amides and Lactams in Aqueous Media: A Novel Application of the Bis(allyl)–Ruthenium(IV) Catalysts [Ru( $\eta^3$ : $\eta^2$ : $\eta^3$ -C<sub>12</sub>H<sub>18</sub>)Cl<sub>2</sub>] and [{Ru( $\eta^3$ : $\eta^3$ -C<sub>10</sub>H<sub>16</sub>)( $\mu$ -Cl)Cl}<sub>2</sub>]” *Chem. Euro. J.* **2007**, *13*, 6590–6594.
5. Tang, X.; Huang, L.; Qi, C.; Wu, X.; Wu, W.; Jiang, H. “Copper-catalyzed sulfonamides formation from sodium sulfinates and amines” *Chem. Comm.* **2013**, *49*, 6102–6104.
6. Tremblay, M. R.; Nevalainen, M.; Nair, S. J.; Porter, J. R.; Castro, A. C.; Behnke, M. L.; Yu, L.-C.; Hagel, M.; White, K.; Faia, K.; Grenier, L.; Campbell, M. J.; Cushing, J.; Woodward, C. N.; Hoyt, J.; Foley, M. A.; Read, M. A.; Sydor, J. R.; Tong, J. K.; Palombella, V. J.; McGovern, K.; Adams, J. “Semisynthetic Cycloamine Analogues as Potent and Orally Bioavailable Hedgehog Pathway Antagonists” *J. Med. Chem.* **2008**, *51*, 6646–6649.
7. Gheorghe, A.; Quiclet-Sire, B.; Vila, X.; Zard, S. Z. “Synthesis of 3-Arylpiperidines by a Radical 1,4-Aryl Migration” *Org. Lett.* **2005**, *7*, 1653–1656.
8. Myers, R. M.; Langston, S. P.; Conway, S. P.; Abell, C. “Reductive Cleavage of N–O Bonds Using Samarium(II) Iodide in a Traceless Release Strategy for Solid-Phase Synthesis” *Org. Lett.* **2000**, 1349–1352.
9. Haupt, J.D.; Berger, M.; Waldvogel, S. R. “Electrochemical Fluorocyclization of N-Allylcarboxamides to 2-Oxazolines by Hypervalent Iodine Mediator” *Org. Lett.* **2019**, *21*, 242–245.
10. Correa, A.; Martín, R. “Palladium-Catalyzed Direct Carboxylation of Aryl Bromides with Carbon Dioxide” *J. Am. Chem. Soc.* **2009**, *131*, 15974–15975.
11. Hartmann, C. E.; Jurčík, V.; Songis, O.; Cazin, C. S. J. “Tandem ammonia borane dehydrogenation/alkene hydrogenation mediated by [Pd(NHC)(PR<sub>3</sub>)] (NHC = N-heterocyclic carbene) catalysts” *Chem. Commun.* **2013**, *49*, 1005–1007.
12. Obermayer, D.; Znidar, D.; Glotz, G.; Stadler, A.; Dallinger, D.; Kappe, C. O. “Design and Performance Validation of a Conductively Heated Sealed-Vessel Reactor for Organic Synthesis” *J. Org. Chem.* **2016**, *81*, 11788–11801.
13. Jamalifard, S.; Mokhtari, J.; Mirjafary, Z. “One-pot synthesis of amides via the oxidative amidation of aldehydes and amines catalyzed by a copper-MOF” *RSC Advances* **2019**, *9*, 22749–22754
14. Yokoyama, S.; Shibauchi, H.; Asahara, H.; Nishiwaki, N. “Metal-Free O-Selective Direct Acylation of Amino Alcohols Through Pseudo-Intramolecular Process” *Euro. J. Org. Chem.* **2019**, *2019*, 1125–1133
15. Shabashov, D.; Maldonado, J. R. M.; Daugulis, O. “Carbon–Hydrogen Bond Functionalization Approach for the Synthesis of Fluorenones and ortho-Arylated Benzonitriles” *J. Org. Chem.* **2008**, *73*, 7818–7821

- 
16. Mei, C.; Hu, Y.; Lu, W. "Visible-Light-Driven Oxidation of N-Alkylamides to Imides Using Oxone/H<sub>2</sub>O and Catalytic KBr" *Synthesis* **2018**, *50*, 2999–3005.
  17. Hwang, J. Y.; Baek, J. H.; Shin, T. I.; Shin, J. H.; Oh, J. W.; Kim, K. P.; You, Y.; Kang, E. J. "Single-Electron-Transfer Strategy for Reductive Radical Cyclization: Fe(CO)<sub>5</sub> and Phenanthroline System" *Org. Lett.* **2016**, *18*, 4900–4903.
  18. Szostak, M.; Spain, M.; Procter, D. J. "Uncovering the Importance of Proton Donors in TmI<sub>2</sub>-Promoted Electron Transfer: Facile C–N Bond Cleavage in Unactivated Amides" *Angew. Chem. Int. Ed.* **2013**, *52*, 7237–7241.
  19. Sakamoto, R.; Sakurai, S.; Maruoka, K. "Alkylsilyl Peroxides as Alkylating Agents in the Copper-Catalyzed Selective Mono-N-Alkylation of Primary Amides and Arylamines" *Chem. Eur. J.* **2017**, *23*, 9030–9033.
  20. El Kaïm, L.; Grimaud, L.; Pravin, P. "Lewis Acid Mediated Fragmentation of Tetrazoles towards Triazoles" *Eur. J. Org. Chem.* **2013**, *2013*, 4752–4755.
  21. Fang, C.; Qian, W.; Bao, W. "A Mild and Clean Method for Oxidative Formation of Amides from Aldehydes and Amines" *Synlett.* **2008**, 2429–2531.
  22. Yang, C.; Li, X.; Wei, J.; Zhu, F.; Gang, F.; Wei, S.; Zhao, Y.; Zhange, J.; Wu, W. "Synthesis and insecticidal activity in vitro and vivo of novel benzenesulfonyl derivatives based on potent target subunit H of V-ATPase" *Bioorg. Med. Chem. Lett.* **2018**, 3164–3167.
